# Supplementary material for: Rapid quantification of goat milk adulteration with cow milk using Raman spectroscopy and chemometrics
Source: Research Square preprint supplement (doi:10.21203/rs.3.rs-1826753/v1), 2022-07-18
Supplement: Supplementary file 1 [file 2f4b80c8bc75daf7a7ff382f.docx]

**Supplementary Information for**

**Rapid quantification of goat milk adulteration with cow milk using Raman spectroscopy and chemometrics**

Wangfang Li1, Wei Huang1, Desheng Fan1, Xuhui Gao1, Xian Zhang1, Yaoyong Meng1,2*, Timon Cheng-yi Liu3

1MOE Key Laboratory of Laser Life Science & Laboratory of Photonic Chinese Medicine, College of Biophotonics, South China Normal University, Guangzhou 510631, China

2Analysis and Testing Center, South China Normal University, Guangzhou 510631,

China

3Laboratory of Laser Sports Medicine, South China Normal University, Guangzhou

510631, China

*Corresponding authors: yaoyongmeng@aliyun.com

## **Determination of optimal A**

To improve the fit of the PLSR model to the original data, we increase the number of PLS components, but this may also reduce its predictive ability due to noise information, which is known as over-fitting. Here, we apply the leave-one-out method for cross-validation, RMSE criterion based on the above cross-validation results are proposed to determine the optimal number of PLS components (A) and prevent the over-fitting problem effectively. For RMSE criterion, the root mean square error (RMSE) is calculated according to equation following, and the optimal A is obtained when the RMSE value is the smallest (Li et al. 2021).

n is the number of samples in the training set, and are the reference value and the predicted value, respectively.

**Reference**

Li S, Ng TT, Yao ZP (2021). Quantitative analysis of blended oils by matrix-assisted laser desorption/ionization mass spectrometry and partial least squares regression. Food Chem 334: 127601.
